# Supplementary material
Source: PubMed Central journal article supplement (PMC3505555)
Supplement: NIHMS399536-supplement-1_si_001.pdf [file NIHMS399536-supplement-1_si_001.pdf]

# Molecular Modeling to Provide Insight into the Substrate Binding and Catalytic Mechanism of Human Biliverdin-IX $\alpha$ Reductase

*Gang Fu*<sup>1</sup>, *Haining Liu*<sup>1</sup> and *Robert J. Doerksen*<sup>1,2\*</sup>

<sup>1</sup>Department of Medicinal Chemistry, <sup>2</sup> Research Institute of Pharmaceutical Science, School of  
Pharmacy, University of Mississippi, University MS, 38677

E-mail: [rjd@olemiss.edu](mailto:rjd@olemiss.edu)

## Supporting Information

**Table S1.** Different components of residue-based binding free energies for the five ternary complexes of hBVR-A/NADPH/substrates.

| Residue              | $\Delta G_{\text{vdW}}$ | $\Delta G_{\text{elec}}$ | $\Delta G_{\text{solv-pol}}$ | $\Delta G_{\text{solv-nonpol}}$ | $\Delta G_{\text{bind}}$ |
|----------------------|-------------------------|--------------------------|------------------------------|---------------------------------|--------------------------|
| <b>Substrate I</b>   |                         |                          |                              |                                 |                          |
| Tyr98                | -1.48                   | -4.19                    | 3.75                         | -0.10                           | -2.02                    |
| Arg172               | -0.04                   | -72.09                   | 63.45                        | -0.02                           | -8.07                    |
| Arg225               | -2.47                   | -96.02                   | 82.00                        | -0.53                           | -17.03                   |
| Arg227               | -0.15                   | -56.84                   | 52.67                        | -0.01                           | -4.33                    |
| <b>Substrate II</b>  |                         |                          |                              |                                 |                          |
| Tyr98                | -1.68                   | 0.56                     | -0.34                        | -0.11                           | -1.57                    |
| Arg172               | 0.46                    | -83.71                   | 68.33                        | -0.05                           | -14.97                   |
| Arg225               | -3.13                   | -80.96                   | 73.86                        | -0.52                           | -10.75                   |
| Arg227               | 0.15                    | -59.44                   | 53.78                        | -0.05                           | -5.56                    |
| <b>Substrate III</b> |                         |                          |                              |                                 |                          |
| Tyr98                | -1.39                   | 0.77                     | 0.44                         | -0.09                           | -0.27                    |
| Arg172               | -0.89                   | -43.80                   | 37.51                        | -0.14                           | -7.31                    |
| Arg225               | -3.54                   | -40.58                   | 38.76                        | -0.56                           | -5.92                    |
| Arg227               | -0.30                   | -26.98                   | 25.82                        | -0.05                           | -1.51                    |
| <b>Substrate IV</b>  |                         |                          |                              |                                 |                          |
| Tyr98                | -0.90                   | 0.47                     | 0.13                         | -0.08                           | -0.38                    |
| Arg172               | 0.03                    | -73.41                   | 62.84                        | -0.07                           | -10.60                   |
| Arg225               | -4.00                   | -89.62                   | 79.48                        | -0.67                           | -14.81                   |
| Arg227               | -0.19                   | -48.11                   | 45.94                        | -0.06                           | -2.42                    |
| <b>Substrate V</b>   |                         |                          |                              |                                 |                          |
| Tyr98                | -1.30                   | -4.08                    | 3.52                         | -0.16                           | -2.02                    |
| Arg172               | -0.52                   | -73.82                   | 68.10                        | -0.04                           | -6.27                    |
| Arg225               | -2.39                   | -89.39                   | 81.44                        | -0.57                           | -10.90                   |
| Arg227               | -0.04                   | -65.62                   | 62.63                        | -0.10                           | -3.12                    |

**Table S2.** Important hydrogen bonding interactions between the conserved water molecules and Substrate **I** and NADPH during the production phase of MD simulations.

| Donor                                              | Acceptor  | Distance (Å) (SD) | Angle (°) (SD) | Occupancy (%) |
|----------------------------------------------------|-----------|-------------------|----------------|---------------|
| Substrate <b>I</b> N <sub>2</sub> -H <sub>11</sub> | Water O   | 3.00 (0.16)       | 27.46 (14.28)  | 27.78         |
| Water H <sub>1</sub>                               | NADPH C=O | 2.72 (0.13)       | 19.42 (12.45)  | 16.67         |
| Water H <sub>2</sub>                               | NADPH C=O | 2.70 (0.13)       | 16.50 (9.15)   | 13.61         |
